# Supplementary material
Source: PubMed Central journal article supplement (PMC2742440)
Supplement: M900088-MCP200_1.pdf [file M900088-MCP200_1.pdf]

# **Supplemental Data**

Supplemental Figure S1

# Supplemental Figure S1

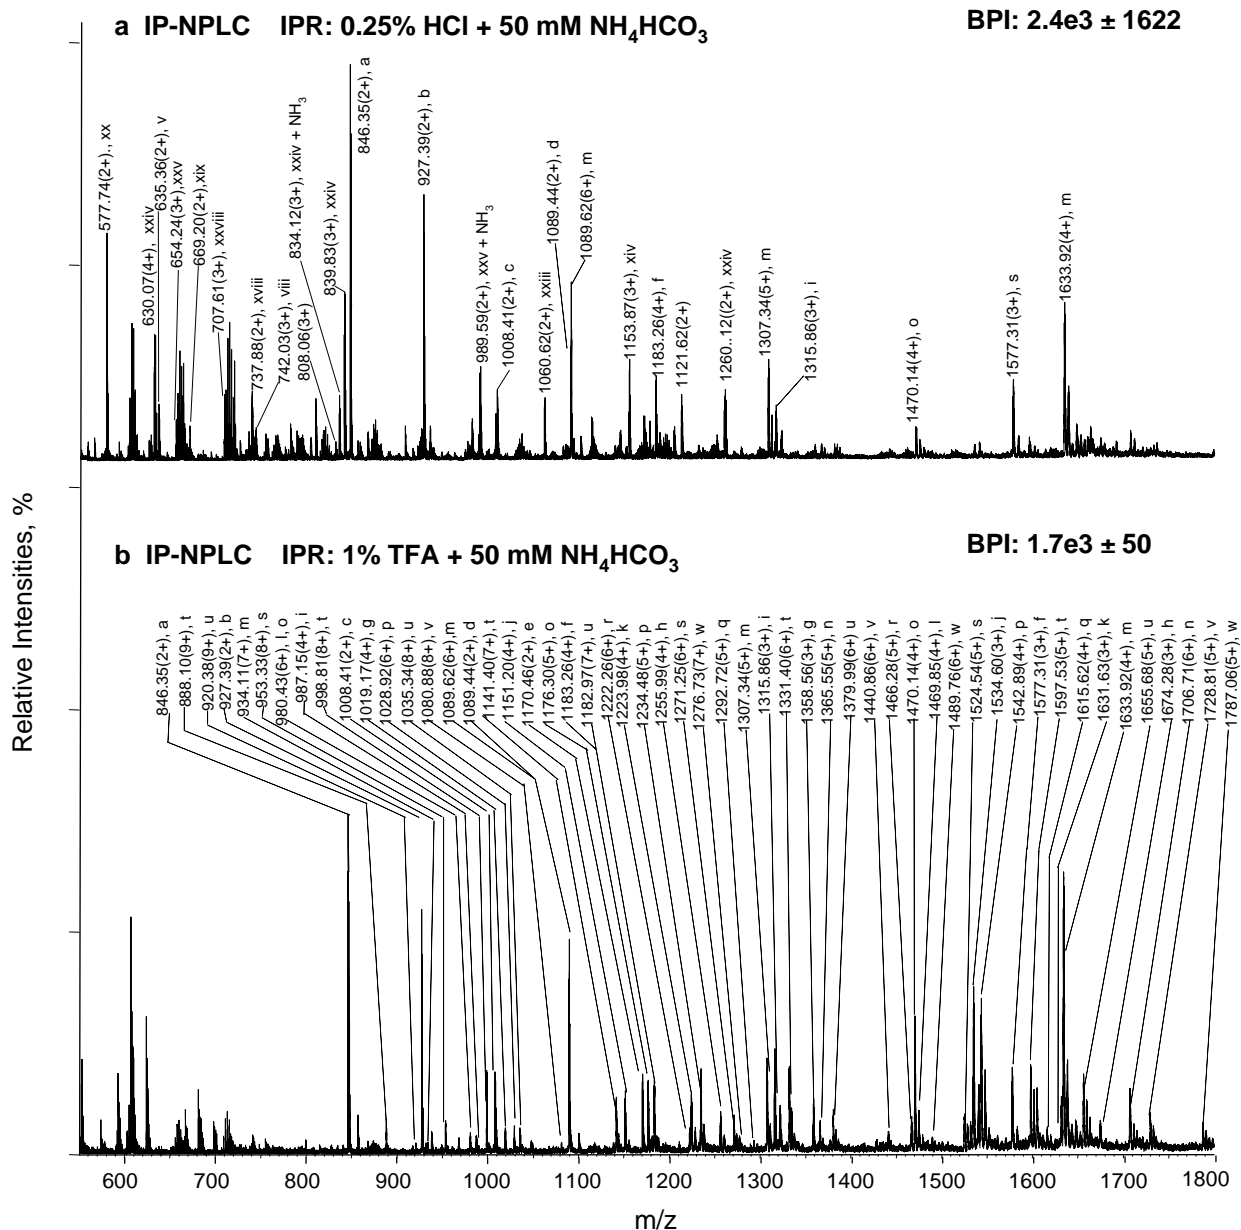

**Supplemental Fig. S1:** Total ion mass spectrum from IP-NPLC-ESI-MS of peptides in the glycopeptide fraction from a RNase B and fetuin tryptic digest injected with the following ion-pairing reagents (IPR): (a) 0.25% HCl + 50 mM NH<sub>4</sub>HCO<sub>3</sub> in 80% ACN/20% H<sub>2</sub>O and (b) 1% TFA + 50 mM NH<sub>4</sub>HCO<sub>3</sub> in 85% ACN/20% H<sub>2</sub>O. The tryptic digest contains: 14.2 pmol RNase B tryptic digest + 13.8 pmol fetuin tryptic digest; BPI: Base peak intensity; All other abundant ions not labeled are singly charged contaminants. Ammonium adducts and minor peptide peaks are not labeled.

Table S1. Effect of acids as ion-pairing reagents on peptide retention and ion intensities in IP-NPLC-MS of a tryptic digest of RNase B and fetuin mixture.

| Peptide no. | peptide m/z measured | z | Calculated hydrophobicity values, $(\Delta G_{\text{octw}})$ kcal/mol* | Ion-pairing reagents |         |             |         |                 |         |             |         |           |         |             |         |                                          |         |             |         |           |         |             |         |      |
|-------------|----------------------|---|------------------------------------------------------------------------|----------------------|---------|-------------|---------|-----------------|---------|-------------|---------|-----------|---------|-------------|---------|------------------------------------------|---------|-------------|---------|-----------|---------|-------------|---------|------|
|             |                      |   |                                                                        | None                 |         |             |         | 20% acetic acid |         |             |         | 0.25% HCl |         |             |         | 1% HCl + 50 mM $\text{NH}_4\text{HCO}_3$ |         |             |         | 0.25% TFA |         |             |         |      |
|             |                      |   |                                                                        | RT                   | % error | Intensities | % error | RT              | % error | Intensities | % error | RT        | % error | Intensities | % error | RT                                       | % error | Intensities | % error | RT        | % error | Intensities | % error |      |
| i           | 557.25               | 1 | -8.0                                                                   | 5.1                  | 10.9    | 1388        | 102.6   | —               | —       | —           | —       | —         | 3.8     | 42.7        | 3290    | 45.3                                     | 2.1     | 0.9         | 216     | 10.1      | 3.5     | 0.8         | 702     | 1.5  |
| ii          | 1260.16              | 2 | -8.5                                                                   | 5.4                  | 2.0     | 5587        | 58.6    | —               | —       | —           | —       | —         | 4.2     | 36.4        | 4150    | 13.5                                     | 1.6     | 2.4         | 1360    | 13.1      | 1.7     | 0.0         | 1170    | 3.4  |
| iii         | 451.20               | 1 | -8.8                                                                   | 2.0                  | 2.7     | 4420        | 20.9    | —               | —       | —           | —       | —         | 5.0     | 0.6         | 2010    | 42.7                                     | —       | —           | —       | —         | 1.7     | 0.0         | 808     | 34.9 |
| iv          | 457.21               | 1 | -8.9                                                                   | —                    | —       | —           | —       | —               | —       | —           | —       | —         | 4.3     | 3.5         | 1215    | 45.3                                     | —       | —           | —       | —         | 3.5     | 0.7         | 395     | 4.3  |
| v           | 635.30               | 2 | -10.1                                                                  | 9.0                  | 30.4    | 5713        | 81.7    | —               | —       | —           | —       | —         | 5.1     | 5.8         | 4840    | 11.7                                     | 2.1     | 0.5         | 98      | 5.4       | 3.5     | 0.2         | 1083    | 6.5  |
| vi          | 847.38               | 1 | -10.3                                                                  | —                    | —       | —           | —       | 8.2             | 2.2     | 1480        | 29.0    | —         | 5.2     | 8.1         | 1214    | 38.3                                     | —       | —           | —       | —         | —       | —           | —       | —    |
| vii         | 602.30               | 1 | -10.4                                                                  | —                    | —       | —           | —       | —               | —       | —           | —       | —         | 5.5     | 5.2         | 1920    | 39.4                                     | —       | —           | —       | —         | 3.4     | 0.9         | 715     | 4.1  |
| viii        | 742.03               | 3 | -10.7                                                                  | 6.3                  | 15.0    | 1715        | 57.3    | 9.2             | 3.7     | 470         | 21.7    | —         | 5.8     | 2.9         | 3660    | 10.0                                     | 5.8     | 0.5         | 148     | 12.4      | 3.4     | 0.7         | 612     | 19.0 |
| viv         | 1006.49              | 3 | -10.7                                                                  | —                    | —       | —           | —       | —               | —       | —           | —       | —         | 5.4     | 6.9         | 1228    | 39.6                                     | 2.1     | 1.4         | 49      | 11.8      | 3.5     | 0.2         | 527     | 6.1  |
| x           | 802.60               | 1 | -10.9                                                                  | —                    | —       | —           | —       | —               | —       | —           | —       | —         | 5.5     | 1.7         | 1263    | 47.1                                     | —       | —           | —       | —         | 2.5     | 2.3         | 112     | 6.1  |
| xi          | 915.41               | 1 | -11.4                                                                  | 6.9                  | 12.4    | 509         | 80.5    | 11.8            | 0.5     | 149         | 11.9    | —         | 5.7     | 4.6         | 955     | 42.2                                     | —       | —           | —       | —         | 3.4     | 1.4         | 413     | 3.0  |
| xii         | 522.22               | 1 | -11.6                                                                  | —                    | —       | —           | —       | —               | —       | —           | —       | —         | 6.2     | 11.5        | 591     | 52.7                                     | 6.5     | 1.5         | 143     | 2.1       | 3.5     | 1.0         | 558     | 5.2  |
| xiii        | 774.38               | 1 | -11.7                                                                  | —                    | —       | —           | —       | —               | —       | —           | —       | —         | 6.2     | 11.5        | 854     | 21.7                                     | 6.6     | 1.2         | 149     | 19.4      | 3.5     | 0.7         | 358     | 3.5  |
| xiv         | 1153.90.5            | 3 | -11.9                                                                  | 9.8                  | 4.5     | 3033        | 33.8    | 7.7             | 15.3    | 2273        | 6.3     | —         | 6.0     | 0.6         | 8043    | 10.6                                     | 6.2     | 0.5         | 831     | 5.0       | 3.5     | 0.2         | 1550    | 3.0  |
| xv          | 816.42               | 1 | -12.0                                                                  | 10.4                 | 3.4     | 825         | 60.7    | —               | —       | —           | —       | —         | 5.3     | 1.7         | 2837    | 31.2                                     | 5.4     | 1.2         | 118     | 12.6      | 3.5     | 0.4         | 692     | 2.2  |
| xvi         | 631.35               | 1 | -12.2                                                                  | —                    | —       | —           | —       | —               | —       | —           | —       | —         | 5.9     | 3.5         | 2393    | 35.1                                     | 6.1     | 1.9         | 276     | 13.7      | 3.5     | 0.8         | 865     | 0.5  |
| xvii        | 591.24               | 1 | -12.2                                                                  | —                    | —       | —           | —       | —               | —       | —           | —       | —         | 6.2     | 0.6         | 1109    | 18.2                                     | 6.5     | 1.3         | 180     | 7.5       | 3.5     | 0.3         | 673     | 2.4  |
| xviii       | 737.88               | 2 | -12.7                                                                  | 6.2                  | 14.0    | 4550        | 88.4    | 11.7            | 1.3     | 8637        | 3.3     | —         | 5.3     | 1.7         | 11200   | 12.0                                     | 5.4     | 2.4         | 836     | 3.8       | 3.4     | 0.6         | 2137    | 4.0  |
| xix         | 669.20               | 2 | -13.3                                                                  | 9.7                  | 3.2     | 403         | 31.5    | —               | —       | —           | —       | —         | 6.7     | 3.5         | 1383    | 18.1                                     | 6.9     | 0.6         | 181     | 1.3       | 3.6     | 0.3         | 430     | 1.4  |
| xx          | 577.74               | 2 | -13.6                                                                  | 11.8                 | 12.5    | 782         | 92.5    | 11.9            | 1.0     | 3863        | 26.6    | —         | 6.6     | 0.6         | 11767   | 7.9                                      | 6.9     | 0.3         | 1643    | 2.4       | 3.5     | 0.3         | 2520    | 0.8  |
| xxi         | 608.22               | 1 | -13.8                                                                  | 13.2                 | 5.9     | 565         | 94.6    | 11.0            | 12.7    | 1223        | 15.3    | —         | 6.9     | 0.6         | 695     | 8.0                                      | —       | —           | —       | —         | 3.6     | 1.1         | 300     | 3.7  |
| xxii        | 662.32               | 1 | -14.0                                                                  | —                    | —       | —           | —       | —               | —       | —           | —       | —         | 7.0     | 1.7         | 576     | 5.0                                      | 7.2     | 1.1         | 78      | 6.7       | 3.6     | 0.3         | 402     | 0.4  |
| xxiii       | 1143.44              | 2 | -14.1                                                                  | 8.5                  | 11.4    | 293         | 78.3    | —               | —       | —           | —       | —         | 7.0     | 0.0         | 2440    | 4.6                                      | 7.2     | 0.3         | 283     | 15.6      | 3.6     | 0.4         | 635     | 2.6  |
| xxiv        | 834.12               | 3 | -14.9                                                                  | 12.7                 | 2.5     | 385         | 136.1   | 11.7            | 1.6     | 3486        | 22.0    | —         | 6.5     | 0.6         | 7803    | 7.4                                      | 6.8     | 0.5         | 790     | 3.1       | 3.5     | 2.4         | 2577    | 2.1  |
| xxv         | 654.24               | 3 | -15.9                                                                  | 12.4                 | 11.7    | 528         | 107.7   | 13.3            | 0.4     | 1560        | 55.6    | —         | 6.9     | 2.9         | 2710    | 5.9                                      | 7.2     | 0.2         | 289     | 0.4       | 3.5     | 0.3         | 833     | 2.6  |
| xxvi        | 733.94               | 2 | -16.1                                                                  | —                    | —       | —           | —       | —               | —       | —           | —       | —         | 7.4     | 0.6         | 1617    | 8.2                                      | 7.4     | 0.1         | 191     | 8.2       | 3.6     | 0.6         | 451     | 4.6  |
| xxvii       | 659.99               | 3 | -17.9                                                                  | —                    | —       | —           | —       | —               | —       | —           | —       | —         | 7.5     | 0.6         | 5203    | 6.4                                      | 7.8     | 0.2         | 544     | 9.4       | 3.5     | 0.7         | 1093    | 1.4  |
| xxviii      | 707.32               | 3 | -18.4                                                                  | —                    | —       | —           | —       | 11.9            | 0.7     | 3530        | 118.7   | —         | 7.1     | 0.6         | 5357    | 7.0                                      | 7.4     | 0.4         | 651     | 3.2       | 3.5     | 0.3         | 1177    | 2.1  |
| xxix        | 789.31               | 3 | -18.6                                                                  | —                    | —       | —           | —       | 11.9            | 0.4     | 335         | 4.5     | —         | 7.7     | 0.6         | 1963    | 11.8                                     | 7.9     | 1.4         | 137     | 21.5      | 4.7     | 0.6         | 204     | 4.4  |
| a           | 846.35               | 2 | -20.0                                                                  | —                    | —       | —           | —       | 11.9            | 0.6     | 721         | 27.8    | —         | 8.9     | 0.1         | 3390    | 3.7                                      | 9.0     | 0.2         | 392     | 3.2       | 8.7     | 0.1         | 3476    | 1.0  |
| b           | 927.39               | 2 | -20.6                                                                  | —                    | —       | —           | —       | 11.8            | 0.5     | 446         | 21.3    | —         | 9.1     | 0.2         | 2243    | 2.5                                      | 9.2     | 0.4         | 244     | 4.1       | 8.9     | 0.3         | 2593    | 4.7  |
| c           | 1008.41              | 2 | -21.1                                                                  | —                    | —       | —           | —       | —               | —       | —           | —       | —         | 9.3     | 0.1         | 699     | 6.1                                      | 9.6     | 0.2         | 149     | 5.4       | 9.1     | 0.8         | 759     | 9.4  |
| d           | 1089.44              | 2 | -21.6                                                                  | —                    | —       | —           | —       | 11.8            | 0.5     | 234         | 12.0    | —         | 9.5     | 0.2         | 1183    | 12.1                                     | 9.4     | 0.2         | 73      | 2.1       | 9.2     | 0.3         | 826     | 21.9 |
| e           | 1170.46              | 2 | -21.9                                                                  | —                    | —       | —           | —       | —               | —       | —           | —       | —         | 9.6     | 0.1         | 503     | 4.4                                      | 9.7     | 0.3         | 69      | 2.6       | 9.3     | 0.1         | 301     | 16.7 |
| f           | 1183.26              | 4 | -26.2                                                                  | 9.4                  | 3.3     | 139         | 61.6    | —               | —       | —           | —       | —         | 11.3    | 0.6         | 2037    | 20.7                                     | 10.9    | 2.2         | 116     | 2.3       | 11.4    | 0.4         | 549     | 3.3  |
| g           | 1256.01              | 4 | -28.8                                                                  | —                    | —       | —           | —       | —               | —       | —           | —       | —         | 12.3    | 1.3         | 84      | 8.3                                      | 11.4    | 0.1         | 56      | 7.5       | 10.5    | 0.1         | 178     | 5.0  |
| h           | 1358.56              | 3 | -21.8                                                                  | —                    | —       | —           | —       | —               | —       | —           | —       | —         | 9.6     | 0.2         | 571     | 1.1                                      | 9.6     | 0.5         | 89      | 9.4       | 10.4    | 0.6         | 194     | 20.4 |
| i           | 1315.86              | 3 | -22.5                                                                  | 6.0                  | 5.8     | 79          | 94.1    | —               | —       | —           | —       | —         | 9.8     | 0.3         | 1217    | 10.7                                     | 9.6     | 0           | 167     | 5.7       | 10.4    | 0.4         | 572     | 8.2  |
| j           | 1534.60              | 3 | -25.2                                                                  | 8.8                  | 5.2     | 102         | 83.1    | —               | —       | —           | —       | —         | 10.9    | 6.7         | 2187    | 23.8                                     | 12.4    | 4.6         | 382     | 7.0       | 12.0    | 0.1         | 1047    | 4.0  |
| k           | 1631.64              | 3 | —                                                                      | —                    | —       | —           | —       | —               | —       | —           | —       | —         | —       | —           | —       | —                                        | 10.7    | 0.1         | 61      | 16.5      | 10.6    | 0.2         | 508     | 6.5  |
| l           | 1469.85              | 4 | -18.4                                                                  | —                    | —       | —           | —       | —               | —       | —           | —       | —         | 8.2     | 0.3         | 183     | 11.0                                     | 8.3     | 0.1         | 45      | 12.5      | 8.5     | 0.4         | 74      | 13.1 |
| m           | 1633.92              | 4 | -22.9                                                                  | 9.8                  | 2.0     | 280         | 60.5    | —               | —       | —           | —       | —         | 10.0    | 0.1         | 5047    | 9.5                                      | 9.9     | 0.1         | 587     | 5.3       | 11.1    | 0.1         | 2036    | 0.3  |
| n           | 1706.71              | 6 | -27.3                                                                  | —                    | —       | —           | —       | —               | —       | —           | —       | —         | 11.7    | 0.2         | 712     | 14.7                                     | 11.1    | 1.07        | 157     | 5.7       | 11.8    | 0.4         | 543     | 1.9  |
| o           | 1470.14              | 4 | -20.7                                                                  | 9.3                  | 2.9     | 105         | 107.6   | 11.8            | 2.1     | 264         | 45.7    | —         | 9.1     | 0.1         | 605     | 6.4                                      | 9.2     | 0.1         | 92      | 3.2       | 11.4    | 1.4         | 796     | 2.0  |
| p           | 1542.89              | 4 | -22.2                                                                  | 9.3                  | 3.5     | 202         | 119.5   | 12.0            | 0.4     | 271         | 42.0    | —         | 9.7     | 0.5         | 524     | 35.7                                     | 10.5    | 10.7        | 85      | 10.4      | 12.2    | 1.1         | 833     | 5.9  |
| q           | 1292.72              | 5 | —                                                                      | —                    | —       | —           | —       | —               | —       | —           | —       | —         | —       | —           | —       | —                                        | —       | —           | —       | —         | 10.5    | 0.3         | 67      | 41.2 |
| r           | 1466.28              | 5 | -18.3                                                                  | —                    | —       | —           | —       | —               | —       | —           | —       | —         | 8.2     | 0.2         | 834     | 8.8                                      | 8.3     | 0.4         | 82      | 14.2      | 8.5     | 0.1         | 143     | 9.5  |
| s           | 1271.25              | 6 | -19.2                                                                  | —                    | —       | —           | —       | —               | —       | —           | —       | —         | 8.6     | 0.2         | 646     | 17.4                                     | 8.6     | 0.1         | 57      | 16.4      | 9.6     | 0.1         | 172     | 12.9 |
| t           | 1597.53              | 5 | -20.4                                                                  | —                    | —       | —           | —       | —               | —       | —           | —       | —         | 9.0     | 0.2         | 1467    | 13.3                                     | 9.0     | 0.1         | 125     | 7.0       | 9.8     | 0.1         | 341     | 6.8  |
| u           | 1655.68              | 5 | -22.6                                                                  | —                    | —       | —           | —       | —               | —       | —           | —       | —         | 9.9     | 9.4         | 1377    | 17.0                                     | 9.6     | 1.6         | 124     | 16.1      | 10.6    | 0.3         | 600     | 3.9  |
| v           | 1728.81              | 5 | -24.4                                                                  | —                    | —       | —           | —       | —               | —       | —           | —       | —         | 10.5    | 10.8        | 609     | 5.0                                      | 10.4    | 2.2         | 79      | 17.0      | 10.9    | 0.1         | 228     | 4.6  |
| w           | 1787.06              | 5 | -25.6                                                                  | —                    | —       | —           | —       | —               | —       | —           | —       | —         | 11.0    | 4.4         | 44      | 12.0                                     | 10.6    | 4.8         | 44      | 3.2       | 12.5    | 0.4         | 201     | 6.5  |

\*: The hydrophobicity values of glycopeptides (a-w) ( $\Delta G_{\text{octw}}$ ) which can not be calculated using MPEXTotalizer due to the presence of glycans, were projected based on their IP-NPLC retention times (RT) and the linear regression equation for non-glycopeptides (i-xxix) ( $\Delta G_{\text{octw}}=2.6\text{RT} - 3.1$ ) using 0.25% HCl as an ion-pairing reagent as described in Fig. 4. The IP-NPLC peak width at the base is < 2 min for > 90% of the glycopeptides detected.

—: Not detected; Intensities: Peak area; % error is based on triplicate IP-NPLC-MS analyses of the standard tryptic digest.

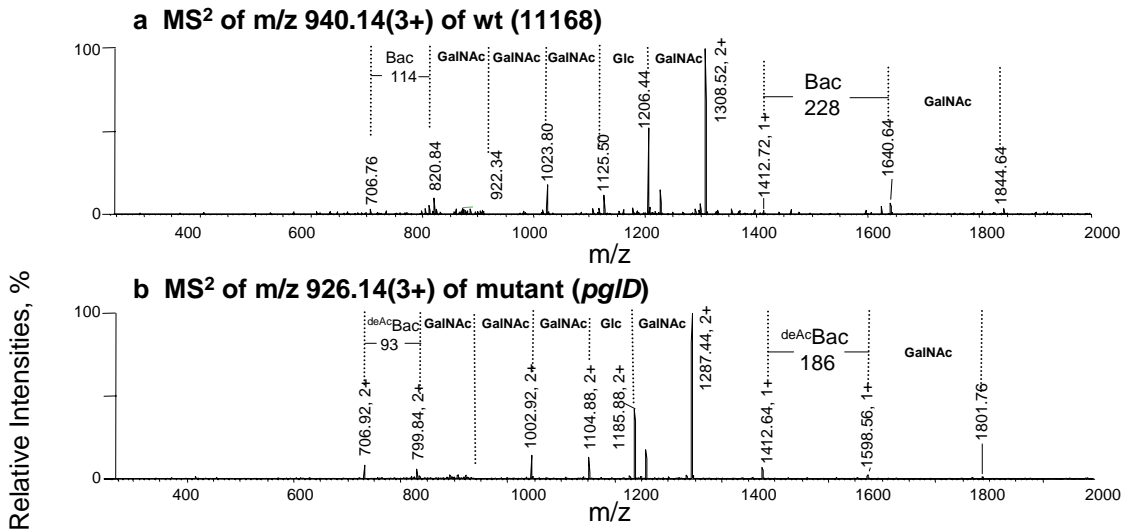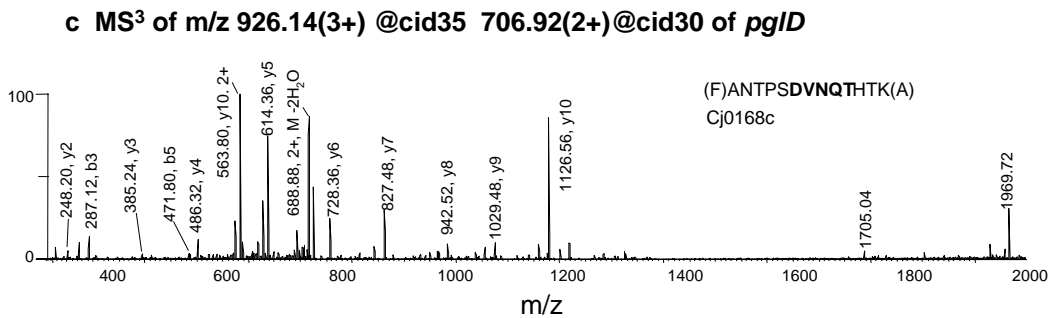

Supplemental Figure S2A

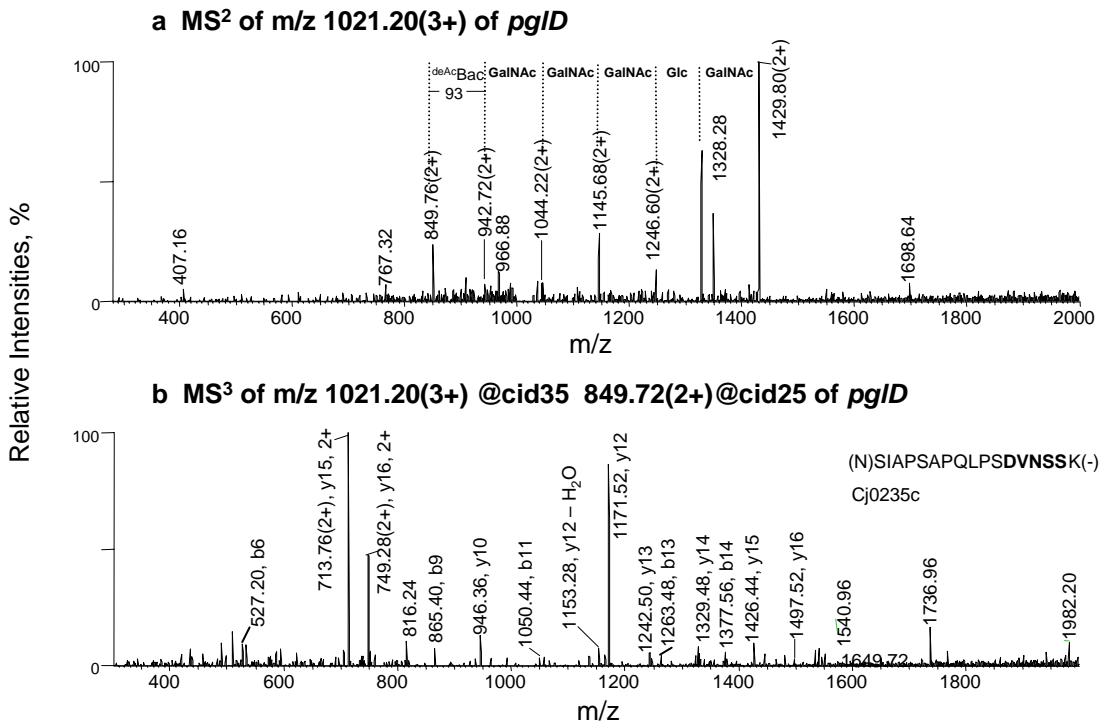

Supplemental Figure S2B

**a MS<sup>2</sup> of m/z 948.14(3+) of *pglD***

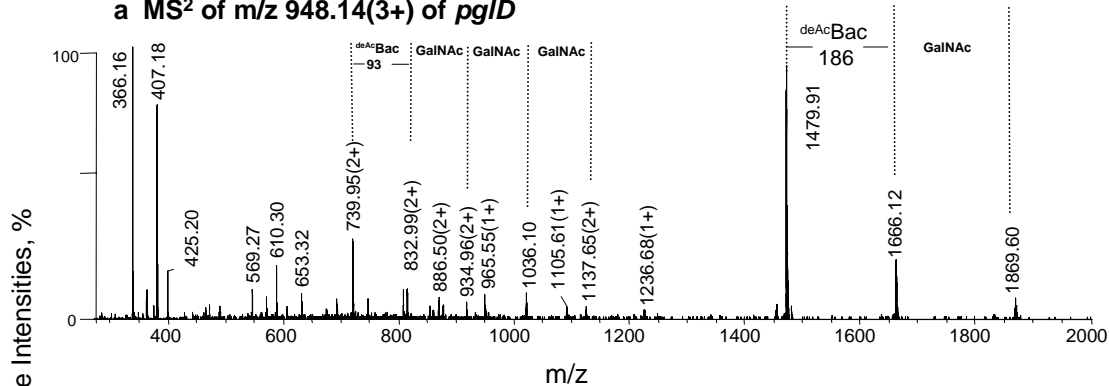

**b MS<sup>3</sup> of m/z 948.14(3+) @cid30 739.95(2+)@cid30 of *pglD***

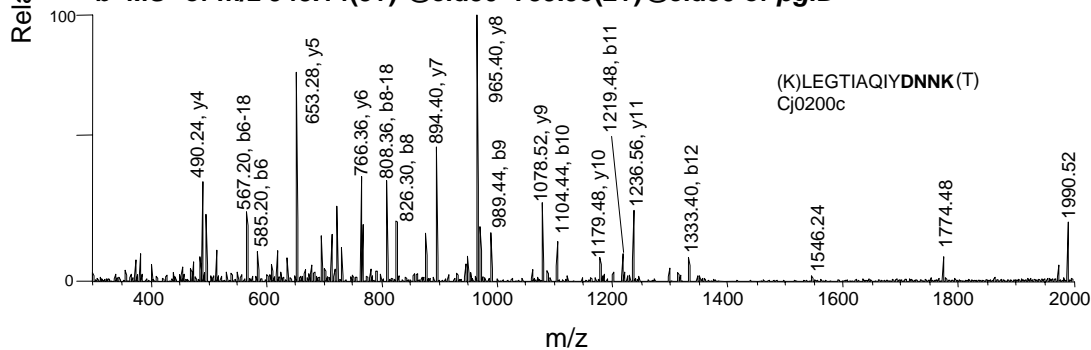

Supplemental Figure S2C

**a MS<sup>2</sup> of m/z 1231.31(3+) of wt (11168)**

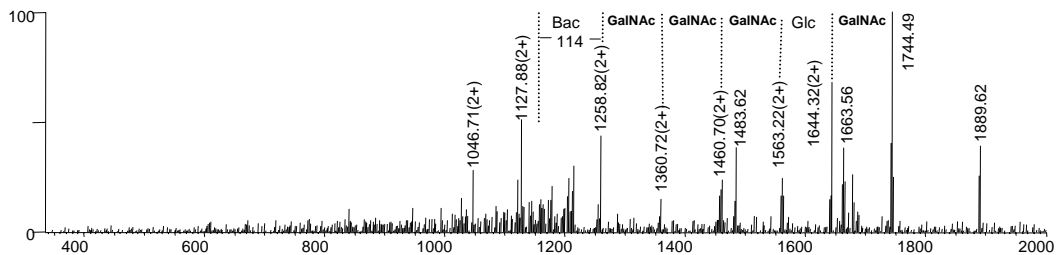

**b MS<sup>2</sup> of m/z 1218.64(3+) of *pgID***

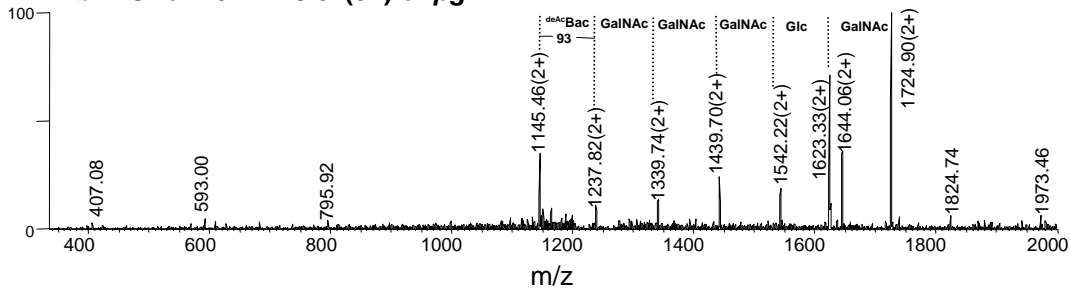

**c MS<sup>3</sup> of m/z 1218.64(3+) @cid35 1145.80(2+)@cid30 of *pgID***

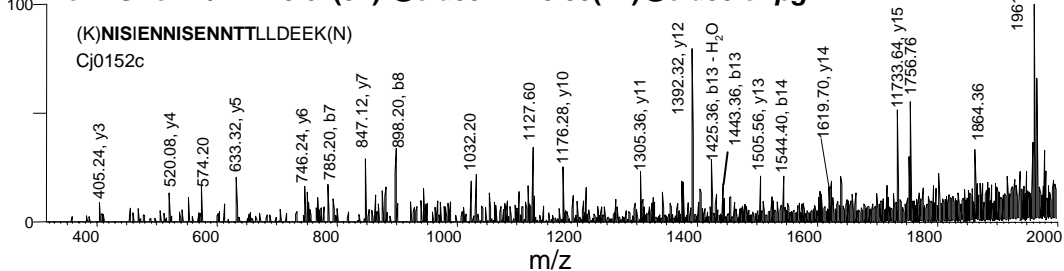

Supplemental Figure S2D

**a MS<sup>2</sup> of m/z 1058.10(2+) of wt(11168)**

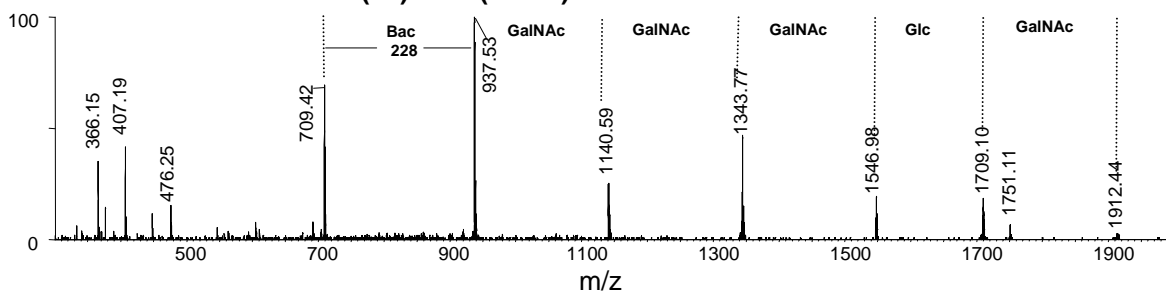

**b MS<sup>3</sup> of m/z 1058.10(2+) @cid35 709.21(1+)@cid20 of wt (11168)**

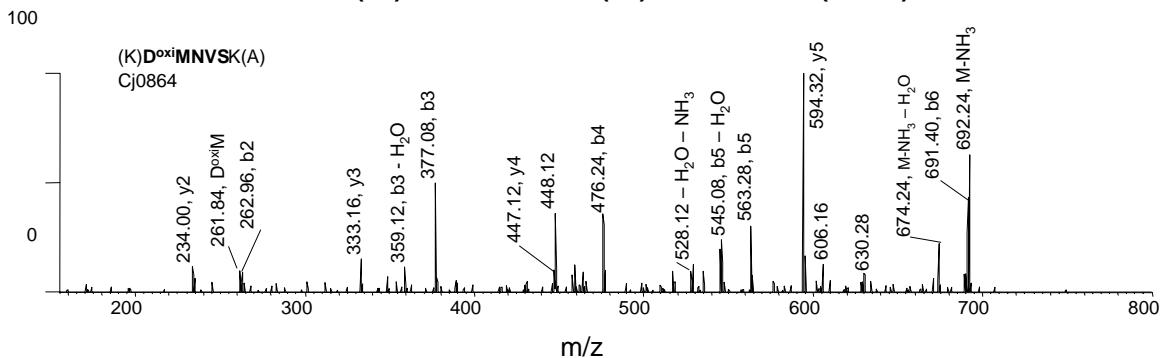

Supplemental Figure S2E

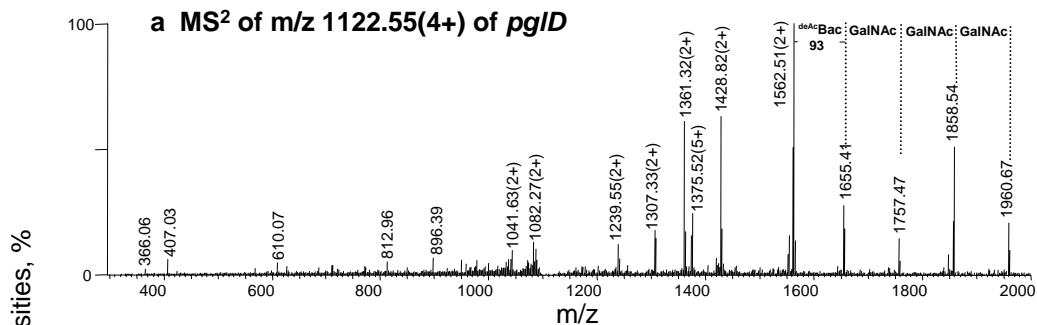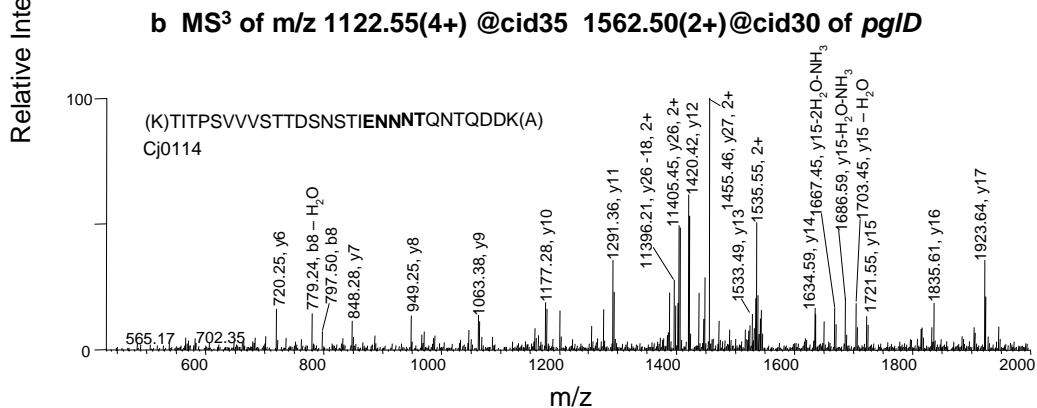

Supplemental Figure S2F

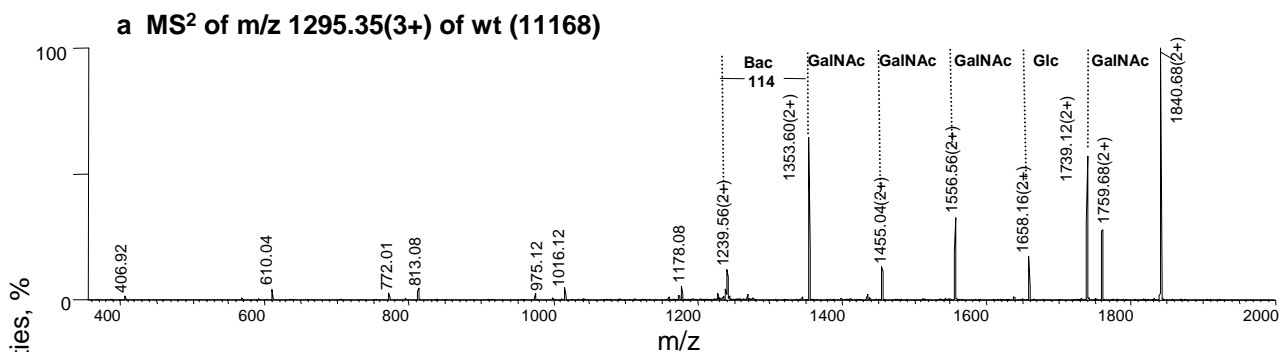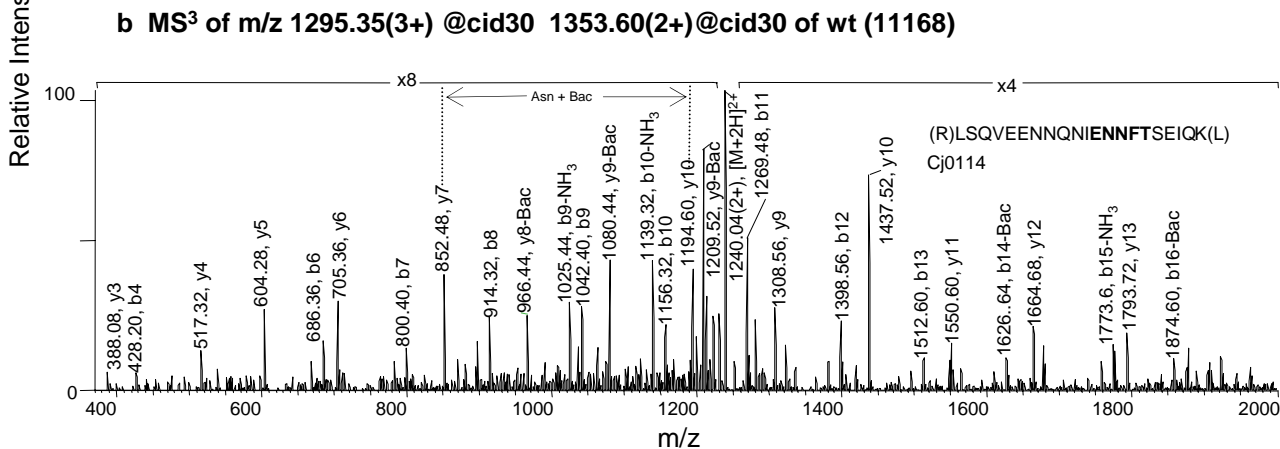

Supplemental Figure S2G

**a MS<sup>2</sup> of m/z 1692.12(2+) of wt (11168)**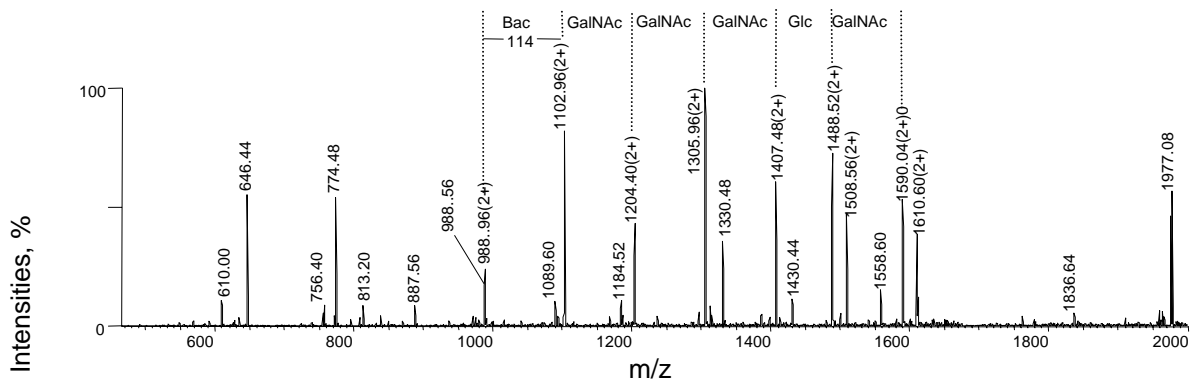**b MS<sup>3</sup> of m/z 1692.12(3+) @cid35 1102.96(2+)@cid30 of wile-type (11168)**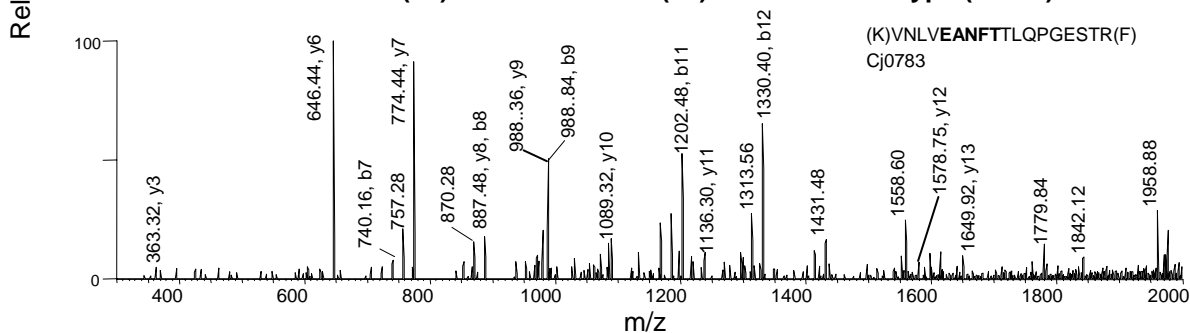

Supplemental Figure S2H

**Supplemental Fig. S2:** MS<sup>2</sup> and MS<sup>3</sup> spectra for the glycopeptides identified from the periplasmic protein extracts of *C. jejuni* 11168 wt and *pglD* mutant. The amino acid sequence and protein I.D. for each of the glycopeptides are provided in the insets in the MS<sup>3</sup> spectra. Further details about these glycopeptides can be found in Table 3. MS<sup>3</sup> analysis was performed on fragment ions composed of the peptide with or without the bacillosamine residue. Bac: bacillosamine (2, 4-diacetamido-2, 4, 6-trideoxyglucopyranose); <sup>deAc</sup>Bac: monoacetylated bacillosamine at the C2 position only (2-acetamido-4-amino-2, 4, 6-trideoxyglucopyranose). Wt: wild-type; <sup>Oxi</sup>M: oxidized methionine.



**Table S2. List of identified peptides in the IP-NPLC non-glycopeptide fraction of the periplasmic protein extract of the isogenic pgID mutant of *C. jejuni* 11168 that generate a MS/MS fragment ion at m/z 204.09 \*.**

| Accession number | Protein name                         | Precursor m/z | z | Sequences of identified non-glycopeptides† | Ion score | Sequence§ coverage % | R.T. (min) |
|------------------|--------------------------------------|---------------|---|--------------------------------------------|-----------|----------------------|------------|
| NP_282485        | Flagellin                            | 949.49        | 2 | (R)LMEELDNIANTTSFNGK(Q)                    | 117       | 19                   | 31.5       |
| NP_281358        | thioredoxin                          | 816.97        | 2 | (M)LAPVIDELSNDFDGK(A)                      | 62        | 30                   | 34.8       |
| NP_281358        | thioredoxin                          | 890.46        | 2 | (R)MLAPVIDELSNDFDGK(A)                     | 85        | 30                   | 35.4       |
| NP_282368        | chaperonin GroEL                     | 882.49        | 2 | (K)GEYVNMLESGIIDPVK(V)                     | 75        | 22                   | 37.0       |
| NP_282264        | membrane bound zinc metallopeptidase | 851.51        | 2 | (K)EAPAIVFIDEIDAIGK(S)                     | 59        | 2                    | 41.8       |
| NP_282065        | DNA-binding protein HU homolog       | 953.50        | 2 | (K)DATTATDAVISTITDVLAK(G)                  | 83        | 19                   | 44.1       |

\*: Variable modifications used for database searching: carbamidomethyl (C), deamidated (N), and oxidation (M) with no enzyme specified.

†: Only the peptide sequences whose ions yielded 204.09(1+) (HexNAc+) upon CID is provided.

§: The sequence coverage is based on all the peptides identified from a protein.

Suggested location: page 8
